# Supplementary material
Source: ML conference proceedings conference paper supplement (https://proceedings.neurips.cc/paper_files/paper/2020/hash/8289889263db4a40463e3f358bb7c7a1-Abstract.html)

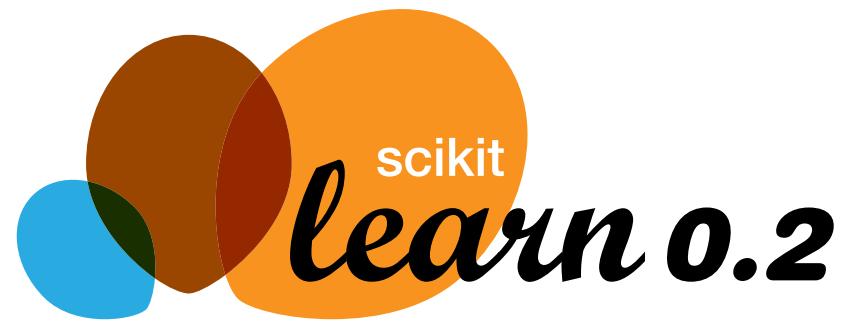

Corporate Identity Manual

**typography**

**HELVETICA NEUE LT  
55 ROMAN**

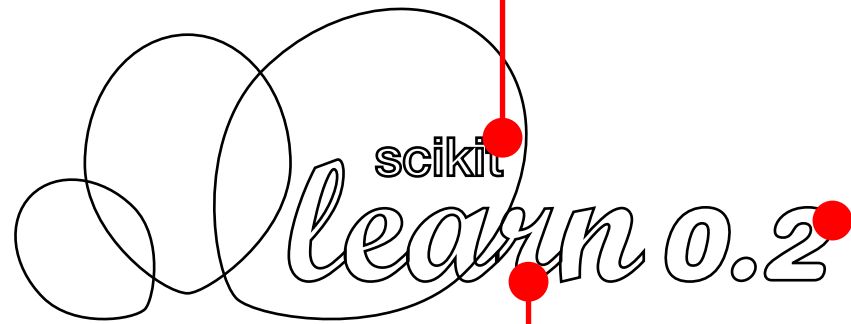

**SCRIPT MT  
BOLD**

**HELVETICA ROUNDED LT  
65 MEDIUM**

**corporate color**

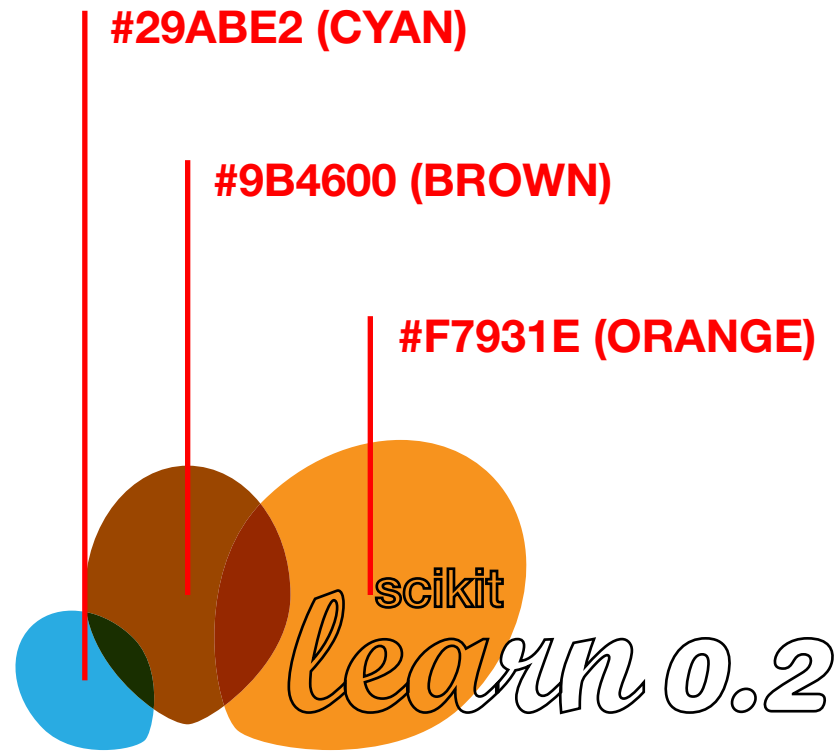

**other versions**

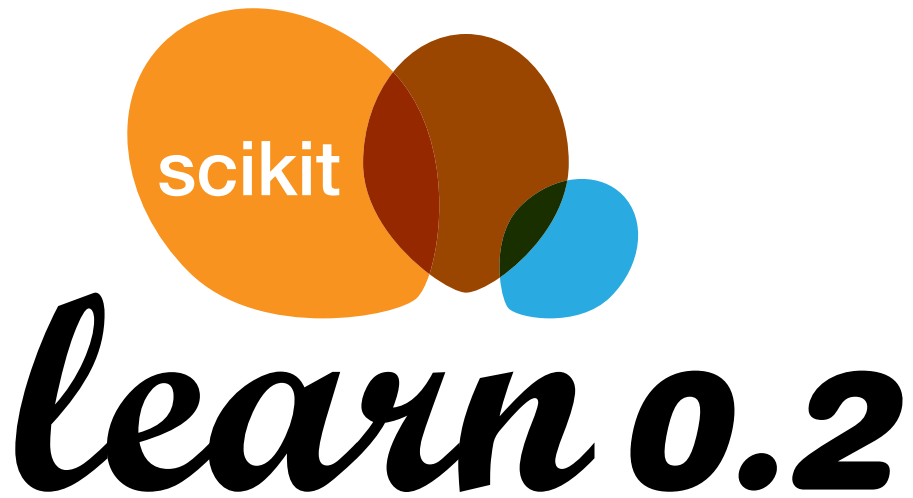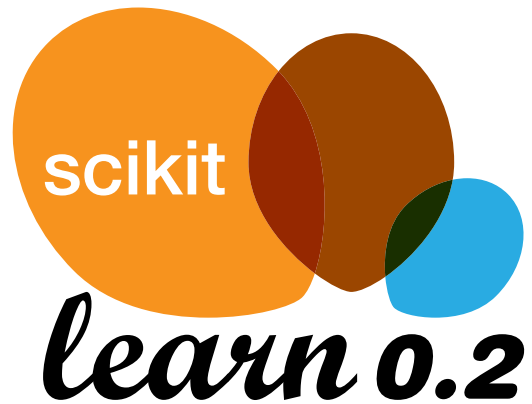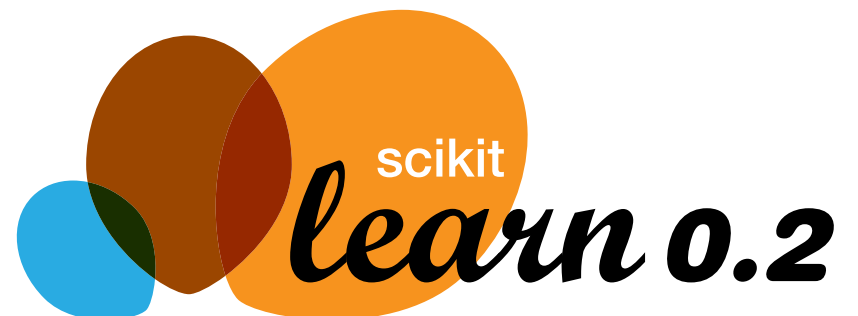

Supplement: Supplementary file [file 8289889263db4a40463e3f358bb7c7a1-Supplemental.zip]
